# Supplementary material for: Turn-on fluorescence detection of ciprofloxacin in tablets based on lanthanide coordination polymer nanoparticles
Source: Royal Society of Chemistry journal article supplement (doi:10.1039/c6ra20357d), 2016-01-01
Supplement: c6ra20357d1.pdf [file c6ra20357d1.pdf]

## Electronic Supplementary Material

### Turn on Fluorescence Detection of Ciprofloxacin in Tablet Based on Lanthanide Coordination Polymer Nanoparticles

Baoxia Liu<sup>a</sup>, Yankai Huang<sup>a,b</sup>, Qi Shen<sup>b</sup>, Xu Zhu<sup>a</sup>, Yuanqiang Hao<sup>a</sup>, Peng Qu<sup>a,b\*</sup>, and Maotian Xu<sup>a,b\*</sup>

<sup>a</sup> Henan Key Laboratory of Biomolecular Recognition and Sensing, College of Chemistry and Chemical Engineering,  
Shangqiu Normal University, Shangqiu 476000, China

<sup>b</sup> College of Chemistry and Molecular Engineering, Zhengzhou University, Zhengzhou 450001, China

\*Corresponding author; Tel/fax: +86 370 2586802; qupeng0212@163.com(Peng Qu), xumaotian@sqnc.edu.cn

(Maotian Xu).

Figure S1

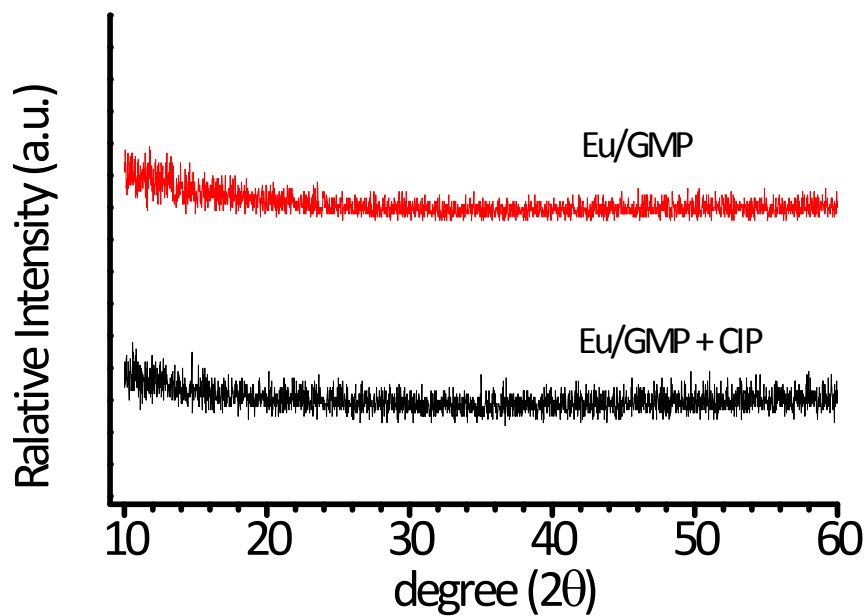

Figure S1 X-ray diffraction (XRD) spectra of Eu/GMP NPs (a) and Eu/GMP NPs in the presence of CIP (b).

Figure S2

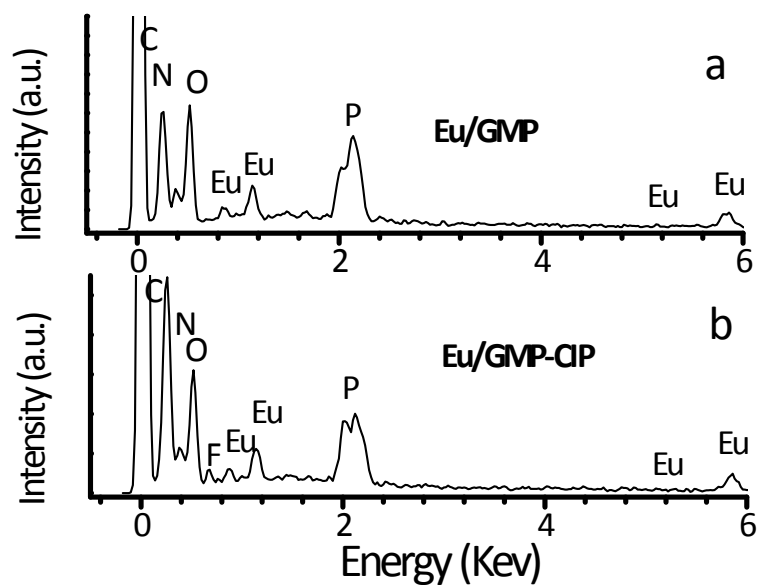

Figure S2 Energy-dispersive X-ray (EDX) spectra of Eu/GMP NPs (a) and Eu/GMP NPs after the addition of CIP (b).

Figure S3

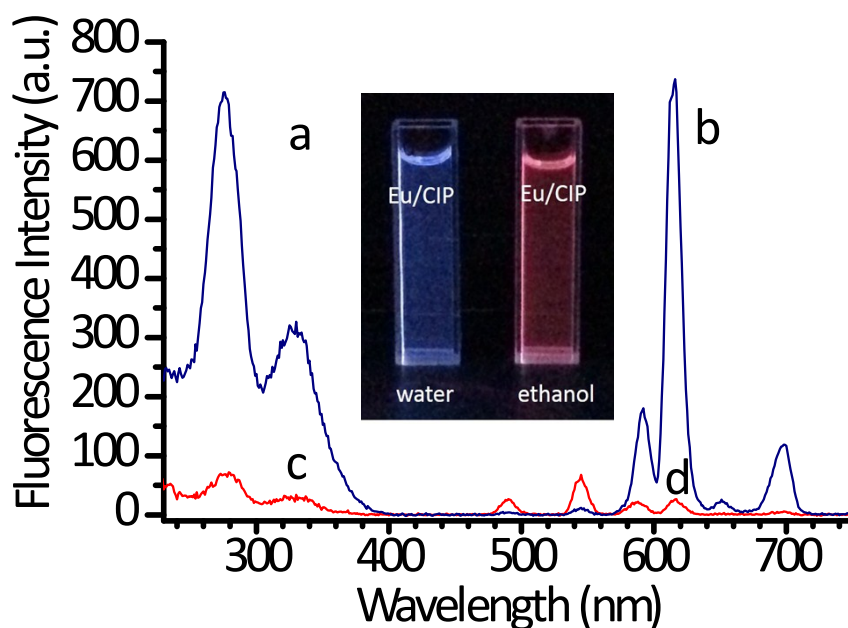

Figure S3 Excitation (left: a and c) and emission (right: b and d) spectra of Eu-CIP in water solutions (c, d) and in ethanol (a, b). (Inset is their fluorescences under a UV lamp).

Figure S4

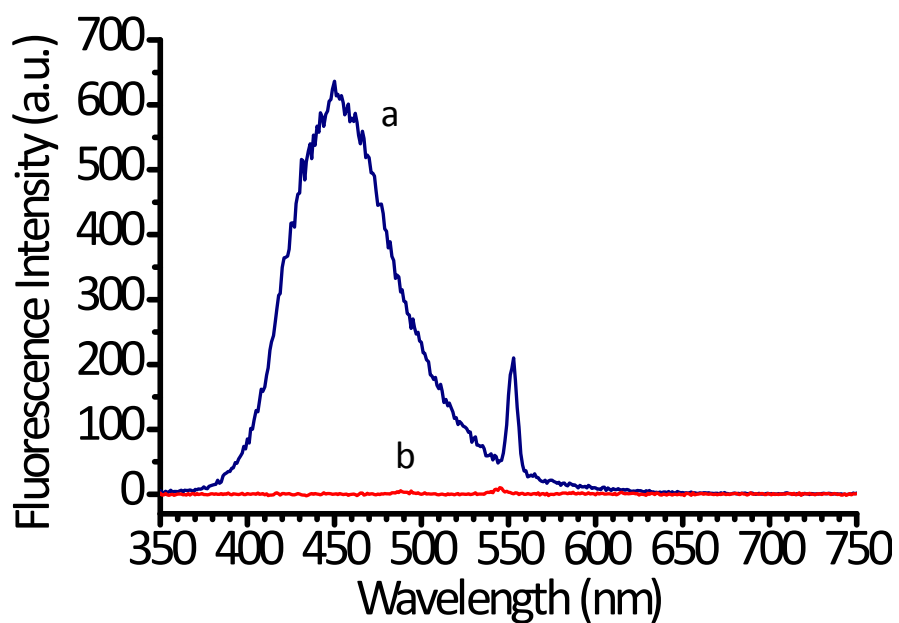

Figure S4 Fluorescence of CIP under fluorescence mode (a) and time-resolve fluorescence mode with UV excitation (b).

Figure S5

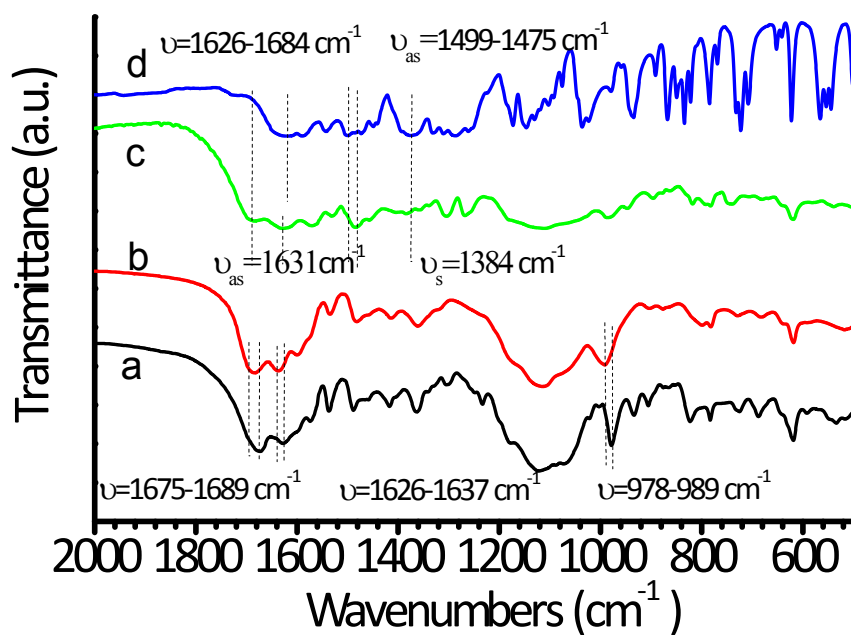

Figure S5 FTIR spectra of GMP (a), Eu/GMP NPs (b), Eu/GMP-CIP NPs (c), and pure CIP (d).  $\nu$ : stretching vibration;  $\delta$ : scissoring vibration.

Figure S6

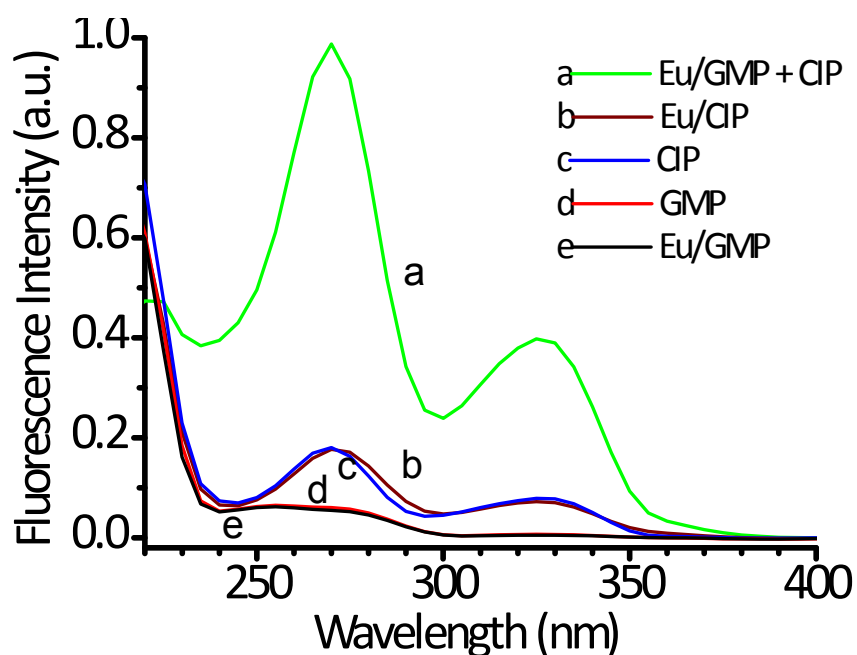

Figure S6 UV-vis spectra of Eu/GMP NPs (1:1, molar ratio), Eu/GMP NPs after the addition of CIP (1:1:6, molar ratio), Eu/CIP (1:1, molar ratio), CIP and GMP in HEPES (pH 7.4).

Figure S7

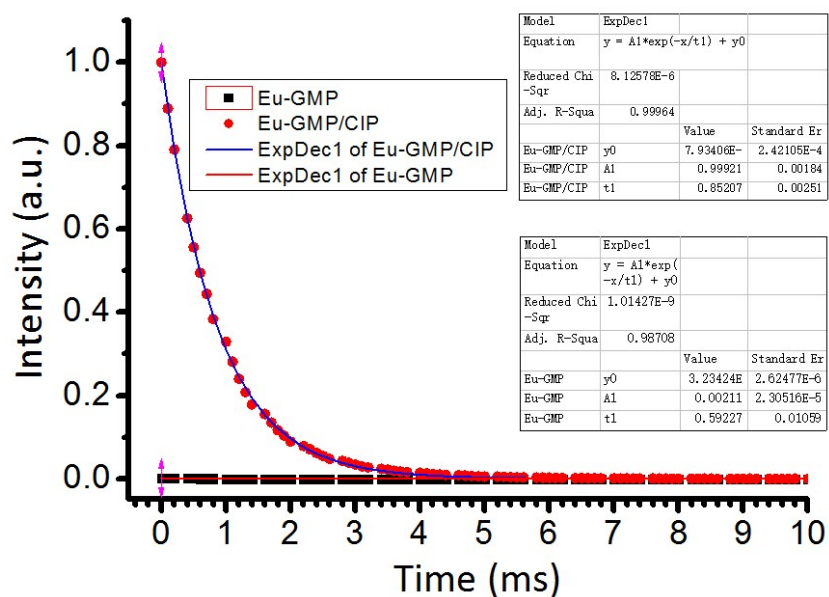

Figure S7. Fluorescence lifetimes of Eu/GMP NPs (a) and Eu/GMP NPs in the presence of CIP (b).

Figure S8

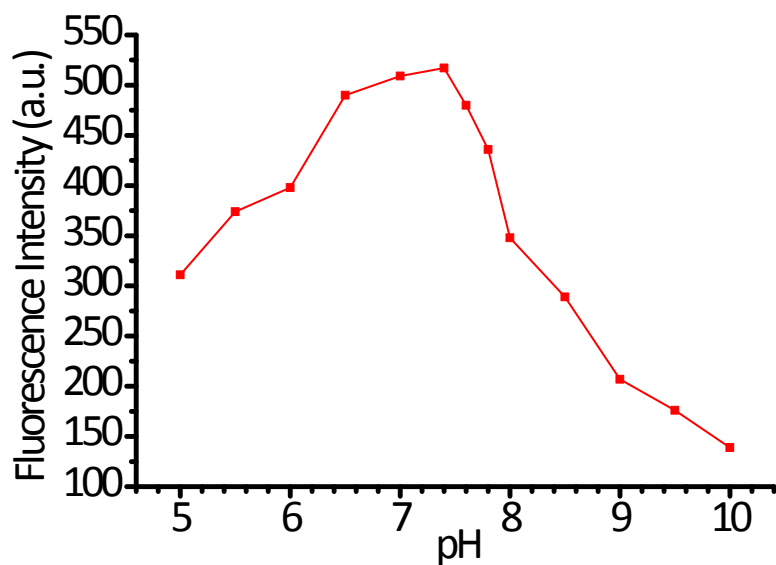

Figure S8. Effect of pH on fluorescence intensity of Eu/GMP NPs in the presence of CIP (20  $\mu$ M).

Figure S9

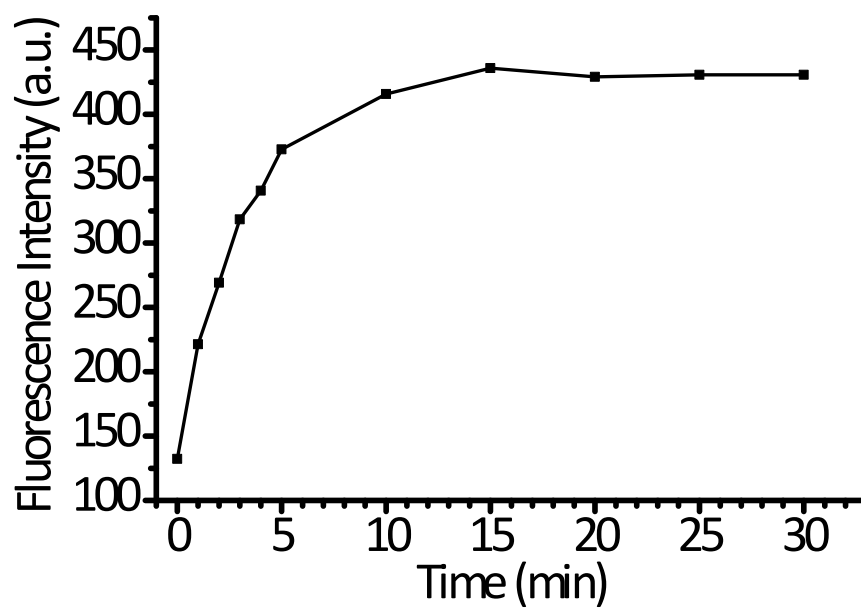

Figure S9. Effect of reaction time on the fluorescence intensity of Eu/GMP NPs at 615 nm in the presence of CIP (20  $\mu$ M)
